# Supplementary material for: Toll-like receptor 4 damages the intestinal epithelial cells by activating endoplasmic reticulum stress in septic rats
Source: PeerJ journal article supplement (doi:10.7717/peerj.18185), 2024-09-26
Supplement: file6_WB_vaule.xls [file file6_WB_vaule.xls]

## Sheet: Sheet1
	Bip	CHOP	P-PERK	β-actin	Bip/β-actin	CHOP/β-actin	P-PERK/β-actin
Control	21.918	18.075	10.507	56.338	0.389045	0.320831	0.186499
Sepsis	75.221	51.929	54.617	59.941	1.25492	0.866335	0.911179
treatment	55.906	29.472	52.899	58.977	0.947929	0.49972	0.896943
	Bip	CHOP	P-PERK	β-actin	Bip/β-actin	CHOP/β-actin	P-PERK/β-actin
Control	30.71	19.742	28.064	60.851	0.504675	0.324432	0.461192
Sepsis	72.131	65.63	63.101	58.286	1.23754	1.126	1.08261
treatment	60.345	30.846	46.623	56.718	1.06395	0.543849	0.822014
	Bip	CHOP	P-PERK	β-actin	Bip/β-actin	CHOP/β-actin	P-PERK/β-actin
Control	25.56	20.157	25.256	58.384	0.437791	0.345249	0.432584
Sepsis	76.324	60.894	60.742	58.896	1.29591	1.03392	1.03134
treatment	58.962	30.731	50.149	56.715	1.03962	0.54185	0.884228
