# Supplementary material for: Toll-like receptor 4 damages the intestinal epithelial cells by activating endoplasmic reticulum stress in septic rats
Source: PeerJ journal article supplement (doi:10.7717/peerj.18185), 2024-09-26
Supplement: File8.zip [file Relative protein level of NF-kB.xlsx]

## Sheet: Grayscale analysis
1					2					3
WB					WB					WB
	Control	Sepsis	Tak-242			Control	Sepsis	Tak-242			Control	Sepsis	Tak-242
NF-κB	33093.6	69693.4	45242.5		NF-κB	33246.3	55075.8	36580.3		NF-KB	28229.3	54261	41261.4
β-actin	52310.7	51981.2	54483.8		β-actin	52998.1	53743.5	55427.5		β-actin	54569.1	52847.7	54504.3
relative expression					relative expression					relative expression
NF-κB	0.632635	1.34074	0.830384		NF-κB	0.627311	1.02479	0.659966		NF-κB	0.517313	1.02674	0.757031
	NF-κB
		Control	Sepsis	Tak-242
	1	0.632635	1.34074	0.830384
	2	0.627311	1.02479	0.659966
	3	0.517313	1.02674	0.757031
