# Supplementary material for: Toll-like receptor 4 damages the intestinal epithelial cells by activating endoplasmic reticulum stress in septic rats
Source: PeerJ journal article supplement (doi:10.7717/peerj.18185), 2024-09-26
Supplement: file9_PCR.zip [file relative mRNA expression of TNF-α and IL-1β.xlsx]

## Sheet: relative mRNA expression
gene	sample	CT	CT(β-actin)	∧CT	average	normalze	fold change	average	stdev		relative mRNA expression
TNF-α	Control-1	29.7705	18.0941	11.6765	11.49	-0.186466	0.878756	0.851288	0.0834908
TNF-α	Control-1	29.9209	18.1006	11.8203	11.49	-0.330276	0.795384
TNF-α	Control-1	29.7309	18.0561	11.6749	11.49	-0.184879	0.879723				TNF-α
TNF-α	Control-2	29.8745	18.4325	11.442	11.49	0.04798	1.03382	0.961373	0.189781
TNF-α	Control-2	29.9848	18.5361	11.4487	11.49	0.0412604	1.02901					Control	sepsis	Treatment
TNF-α	Control-2	29.9603	18.1863	11.774	11.49	-0.284038	0.821289				1	0.851288	2.62226	1.2014
TNF-α	Control-3	31.9033	21.0479	10.8555	11.49	0.634535	1.55244	1.25471	0.36794		2	0.961373	3.152	0.639088
TNF-α	Control-3	32.5905	21.0052	11.5853	11.49	-0.0952909	0.936083				3	1.25471	2.33295	0.928326
TNF-α	Control-3	32.0805	20.9417	11.1388	11.49	0.351195	1.27562
TNF-α	sepsis-1	29.1083	18.9994	10.1089	11.49	1.38114	2.60475	2.62226	0.178478
TNF-α	sepsis-1	29.2057	18.9219	10.2839	11.49	1.20614	2.3072
TNF-α	sepsis-1	28.7669	18.8399	9.92692	11.49	1.56308	2.95484
TNF-α	sepsis-2	29.9733	20.4081	9.56517	11.49	1.92483	3.79692	3.152	0.287447
TNF-α	sepsis-2	30.3859	20.5328	9.85305	11.49	1.63695	3.11007
TNF-α	sepsis-2	30.6053	20.4652	10.1401	11.49	1.34993	2.549
TNF-α	sepsis-3	28.4611	18.338	10.1231	11.49	1.36687	2.57911	2.33295	0.156563
TNF-α	sepsis-3	28.6731	18.2375	10.4356	11.49	1.05441	2.07687				IL-1β
TNF-α	sepsis-3	28.5124	18.2507	10.2617	11.49	1.22828	2.34288
TNF-α	Treatment-1	30.2159	18.8444	11.3715	11.49	0.118487	1.0856	1.2014	0.223293			Control	sepsis	Treatment
TNF-α	Treatment-1	30.0057	18.6452	11.3605	11.49	0.12951	1.09392				1	0.84593	3.17772	1.34035
TNF-α	Treatment-1	29.6711	18.6918	10.9794	11.49	0.510636	1.42468				2	0.845171	4.81393	1.32651
TNF-α	Treatment-2	30.2265	18.0893	12.1372	11.49	-0.647181	0.638527	0.639088	0.211351		3	1.42008	3.07241	1.83105
TNF-α	Treatment-2	30.3773	18.0154	12.3619	11.49	-0.871894	0.546429
TNF-α	Treatment-2	30.1993	18.2599	11.9395	11.49	-0.449479	0.732307
TNF-α	Treatment-3	31.174	19.3787	11.7953	11.49	-0.30531	0.809268	0.928326	0.341856
TNF-α	Treatment-3	30.9171	19.6853	11.2318	11.49	0.258172	1.19596
TNF-α	Treatment-3	31.1919	19.343	11.8489	11.49	-0.358924	0.779746
IL-1β	Control-1	29.6665	18.0941	11.5724	11.356	-0.216432	0.860692	0.84593	0.10618
IL-1β	Control-1	29.6109	18.1006	11.5103	11.356	-0.154273	0.898585
IL-1β	Control-1	29.7733	18.0561	11.7172	11.356	-0.361207	0.778513
IL-1β	Control-2	30.1964	18.4325	11.7639	11.356	-0.407908	0.753715	0.845171	0.220594
IL-1β	Control-2	29.8935	18.5361	11.3575	11.356	-0.00145239	0.998994
IL-1β	Control-2	29.8956	18.1863	11.7093	11.356	-0.353276	0.782804
IL-1β	Control-3	32.0982	21.0479	11.0503	11.356	0.305657	1.23598	1.42008	0.179951
IL-1β	Control-3	31.6993	21.0052	10.6941	11.356	0.661889	1.58215
IL-1β	Control-3	31.7695	20.9417	10.8278	11.356	0.528174	1.4421
IL-1β	sepsis-1	28.6916	18.9994	9.69213	11.356	1.66387	3.16865	3.17772	0.0215082
IL-1β	sepsis-1	28.6292	18.9219	9.70733	11.356	1.64867	3.13544
IL-1β	sepsis-1	28.5048	18.8399	9.66488	11.356	1.69112	3.22907
IL-1β	sepsis-2	29.7481	20.4081	9.34003	11.356	2.01597	4.04451	4.81393	0.213419
IL-1β	sepsis-2	29.4668	20.5328	8.93393	11.356	2.42207	5.35941
IL-1β	sepsis-2	29.4884	20.4652	9.02318	11.356	2.33282	5.03788
IL-1β	sepsis-3	28.1562	18.338	9.81816	11.356	1.53784	2.90358	3.07241	0.0726895
IL-1β	sepsis-3	27.9563	18.2375	9.71878	11.356	1.63722	3.11067
IL-1β	sepsis-3	27.9273	18.2507	9.67659	11.356	1.67941	3.20298
IL-1β	Treatment-1	29.5787	18.8444	10.7343	11.356	0.621656	1.53864	1.34035	0.205089
IL-1β	Treatment-1	29.7895	18.6452	11.1443	11.356	0.211688	1.15804
IL-1β	Treatment-1	29.6425	18.6918	10.9507	11.356	0.405309	1.32437
IL-1β	Treatment-2	29.3154	18.0893	11.2261	11.356	0.129884	1.09421	1.32651	0.349779
IL-1β	Treatment-2	29.1446	18.0154	11.1292	11.356	0.22676	1.1702
IL-1β	Treatment-2	28.8375	18.2599	10.5777	11.356	0.77832	1.71513
IL-1β	Treatment-3	29.904	19.3787	10.5253	11.356	0.830739	1.7786	1.83105	0.231323
IL-1β	Treatment-3	29.9364	19.6853	10.2511	11.356	1.10486	2.15078
IL-1β	Treatment-3	30.0539	19.343	10.711	11.356	0.64504	1.56378
GAPDH	Control-1	18.0941
GAPDH	Control-1	18.1006
GAPDH	Control-1	18.0561
GAPDH	Control-2	18.4325
GAPDH	Control-2	18.5361
GAPDH	Control-2	18.1863
GAPDH	Control-3	21.0479
GAPDH	Control-3	21.0052
GAPDH	Control-3	20.9417
GAPDH	sepsis-1	18.9994
GAPDH	sepsis-1	18.9219
GAPDH	sepsis-1	18.8399
GAPDH	sepsis-2	20.4081
GAPDH	sepsis-2	20.5328
GAPDH	sepsis-2	20.4652
GAPDH	sepsis-3	18.338
GAPDH	sepsis-3	18.2375
GAPDH	sepsis-3	18.2507
GAPDH	Treatment-1	18.8444
GAPDH	Treatment-1	18.6452
GAPDH	Treatment-1	18.6918
GAPDH	Treatment-2	18.0893
GAPDH	Treatment-2	18.0154
GAPDH	Treatment-2	18.2599
GAPDH	Treatment-3	19.3787
GAPDH	Treatment-3	19.6853
GAPDH	Treatment-3	19.343
