# Supplementary material for: Toll-like receptor 4 damages the intestinal epithelial cells by activating endoplasmic reticulum stress in septic rats
Source: PeerJ journal article supplement (doi:10.7717/peerj.18185), 2024-09-26
Supplement: file10.xlsx [file file10.xlsx]

## Sheet: MSS
time(d)	control										sepsis										treatment
1	7	6	5	7	5	5	6	7	6	4	21	18	18	17	19	17	18	17	18	19	16	18	17	18	16	19	17	20	15	18
2	5	4	4	5	5	5	5	6	5	4		17	16	15	15	19	18	20			12	13	14	14	12	12	13		15	14
3	4	3	3	2	4	3	4	3	3	2		13	13	12	13	15	15				10	10		9	9	10	10		12	10
4	0	2	1	2	1	0	1	1	2	1		11	9	12	10	11	22					8		8	7	8	7		9	8
5	0	1	1	1	1	0	0	1	0	0		7	8	7	8	9						5		6	4	5	6		5	4
6	0	0	1	0	0	0	0	0	0	0		5	5	6	6	7						2		2	3	2	3		2	3
7	0	0	1	0	0	0	0	0	0	0		3	3	4	4	3						0		1	1	0	0		0	0
time(d)	1	2	3	4	5	6	7
1	7	5	4	0	0	0	0
1	6	4	3	2	1	0	0
1	5	4	3	1	1	1	1
1	7	5	2	2	1	0	0
1	5	5	4	1	1	0	0
1	5	5	3	0	0	0	0
1	6	5	4	1	0	0	0
1	7	6	3	1	1	0	0
1	6	5	3	2	0	0	0
1	4	4	2	1	0	0	0
2	21
2	18	17	13	11	7	5	3
2	18	16	13	9	8	5	3
2	17	15	12	12	7	6	4
2	19	15	13	10	8	6	4
2	17	19	15	11	9	7	3
2	18	18	15	22
2	17	20
2	18
2	19
3	16	12	10
3	18	13	10	8	5	2	0
3	17	14
3	18	14	9	8	6	2	1
3	16	12	9	7	4	3	1
3	19	12	10	8	5	2	0
3	17	13	10	7	6	3	0
3	20
3	15	15	12	9	5	2	0
3	18	14	10	8	4	3	0

## Sheet: survival
group	Day1	Day2	Day3	Day4	Day5	Day6	Day7
Control	10	10	10	10	10	10	10
Sepsis	9	7	6	6	5	5	5
Treatment	10	9	8	7	7	7	7
1-death
0-survival
time（d）	Control	Sepsis	Treatment
7	0
7	0
7	0
7	0
7	0
7	0
7	0
7	0
7	0
7	0
1		1
2		1
2		1
3		1
5		1
2			1
3			1
4			1
7		0
7		0
7		0
7		0
7		0
7			0
7			0
7			0
7			0
7			0
7			0
7			0

## Sheet: food intake
time(d)	control										sepsis										treatment
0	42	43	46	50	43	43	43	42	40	44	43	46	43	47	53	50	41	43	48	42	42	47	43	50	53	48	45	41	44	46
1	40	38	44	48	40	44	40	40	38	41		22	23	18	26	20	23	21	22	25	16	19	21	26	32	28	29	20	24	21
2	38	41	48	46	41	42	44	41	43	40		18	16	14	21	18	15				8	22	13	21	28	19	24		22	19
3	41	37	40	51	44	43	48	35	35	37		24	27	22	29	24	16				6	25		32	30	28	25		28	25
4	46	37	35	45	38	37	43	37	39	36		28	32	24	32	29	5					31		35	38	32	31		33	30
5	41	42	44	51	42	46	43	39	36	40		28	30	28	31	33						39		40	41	39	35		36	38
6	50	41	45	43	39	30	40	30	42	41		32	29	31	33	34						36		41	44	43	40		41	35
7	43	36	43	47	42	42	46	34	39	36		33	29	34	36	37						42		38	41	39	38		42	34
time(d)	0	1	2	3	4	5	6	7
1	42	40	38	41	46	41	50	43
1	43	38	41	37	37	42	41	36
1	46	44	48	40	35	44	45	43
1	50	48	46	51	45	51	43	47
1	43	40	41	44	38	42	39	42
1	43	44	42	43	37	46	30	42
1	43	40	44	48	43	43	40	46
1	42	40	41	35	37	39	30	34
1	40	38	43	35	39	36	42	39
1	44	41	40	37	36	40	41	36
2	43
2	46	22	18	24	28	28	32	33
2	43	23	16	27	32	30	29	29
2	47	18	14	22	24	28	31	34
2	53	26	21	29	32	31	33	36
2	50	20	18	24	29	33	34	37
2	41	23	15	16	5
2	43	21
2	48	22
2	42	25
3	42	16	8	6
3	47	19	22	25	31	39	36	42
3	43	21	13
3	50	26	21	32	35	40	41	38
3	53	32	28	30	38	41	44	41
3	48	28	19	28	32	39	43	39
3	45	29	24	25	31	35	40	38
3	41	20
3	44	24	22	28	33	36	41	42
3	46	21	19	25	30	38	35	34

## Sheet: weight loss(%)
time(d)	control										Sepsis										Treatment
1	243	252	255	260	242	243	247	248	245	244	241	245	243	248	254	253	253	248	243	251	246	243	253	256	248	254	255	243	246	247
2	238	247	250	252	236	240	241	244	241	240	215	227	224	224	236	231	228	218	214	213	215	225	232	235	233	238	237	223	228	232
loss(%)	2.05761	1.98413	1.96078	3.07692	2.47934	1.23457	2.42915	1.6129	1.63265	1.63934	10.7884	7.34694	7.81893	9.67742	7.08661	8.69565	9.88142	12.0968	11.9342	15.1394	12.6016	7.40741	8.3004	8.20312	6.04839	6.29921	7.05882	8.23045	7.31707	6.07287
3	242	248	251	253	238	240	242	243	241	238		224	226	225	230	226	192				192	218	188	228	227	228	233	176	235	228
loss(%)	0.411523	1.5873	1.56863	2.69231	1.65289	1.23457	2.02429	2.01613	1.63265	2.45902		8.57143	6.99588	9.27419	9.44882	10.6719	24.1107				21.9512	10.2881	25.6917	10.9375	8.46774	10.2362	8.62745	27.572	4.47154	7.69231
4	243	253	259	255	243	239	248	250	244	236		217	214	220	219	220	183					232		235	237	241	240		238	235
loss(%)	0	-0.396825	-1.56863	1.92308	-0.413223	1.64609	-0.404858	-0.806452	0.408163	3.27869		11.4286	11.9342	11.2903	13.7795	13.0435	27.668					4.52675		8.20312	4.43548	5.11811	5.88235		3.25203	4.8583
5	245	247	253	258	244	241	246	246	243	240		220	221	226	230	228						234		241	238	246	243		239	244
loss(%)	-0.823045	1.98413	0.784314	0.769231	-0.826446	0.823045	0.404858	0.806452	0.816327	1.63934		10.2041	9.0535	8.87097	9.44882	9.88142						3.7037		5.85938	4.03226	3.14961	4.70588		2.84553	1.21457
6	240	244	255	254	243	246	243	247	243	245		229	230	232	237	239						243		248	243	249	248		243	244
loss(%)	1.23457	3.1746	0	2.30769	-0.413223	-1.23457	1.61943	0.403226	0.816327	-0.409836		6.53061	5.34979	6.45161	6.69291	5.5336						0		3.125	2.01613	1.9685	2.7451		1.21951	1.21457
7	243	243	251	253	244	246	243	253	244	244		233	234	239	243	241						240		249	240	247	248		240	241
loss(%)	0	3.57143	1.56863	2.69231	-0.826446	-1.23457	1.61943	-2.01613	0.408163	0		4.89796	3.7037	3.62903	4.33071	4.74308						1.23457		2.73438	3.22581	2.75591	2.7451		2.43902	2.42915
group	D1	D2	D3	D4	D5	D6	D7
1	0	2.05761	0.411523	0	-0.823045	1.23457	0
1	0	1.98413	1.5873	-0.396825	1.98413	3.1746	3.57143
1	0	1.96078	1.56863	-1.56863	0.784314	0	1.56863
1	0	3.07692	2.69231	1.92308	0.769231	2.30769	2.69231
1	0	2.47934	1.65289	-0.413223	-0.826446	-0.413223	-0.826446
1	0	1.23457	1.23457	1.64609	0.823045	-1.23457	-1.23457
1	0	2.42915	2.02429	-0.404858	0.404858	1.61943	1.61943
1	0	1.6129	2.01613	-0.806452	0.806452	0.403226	-2.01613
1	0	1.63265	1.63265	0.408163	0.816327	0.816327	0.408163
1	0	1.63934	2.45902	3.27869	1.63934	-0.409836	0
2	0	10.7884
2	0	7.34694	8.57143	11.4286	10.2041	6.53061	4.89796
2	0	7.81893	6.99588	11.9342	9.0535	5.34979	3.7037
2	0	9.67742	9.27419	11.2903	8.87097	6.45161	3.62903
2	0	7.08661	9.44882	13.7795	9.44882	6.69291	4.33071
2	0	8.69565	10.6719	13.0435	9.88142	5.5336	4.74308
2	0	9.88142	24.1107	27.668
2	0	12.0968
2	0	11.9342
2	0	15.1394
3	0	12.6016	21.9512	4.52675	3.7037	0	1.23457
3	0	7.40741	10.2881
3	0	8.3004	25.6917	8.20312	5.85938	3.125	2.73438
3	0	8.20312	10.9375	4.43548	4.03226	2.01613	3.22581
3	0	6.04839	8.46774	5.11811	3.14961	1.9685	2.75591
3	0	6.29921	10.2362	5.88235	4.70588	2.7451	2.7451
3	0	7.05882	8.62745
3	0	8.23045	27.572	3.25203	2.84553	1.21951	2.43902
3	0	7.31707	4.47154	4.8583	1.21457	1.21457	2.42915
3	0	6.07287	7.69231
time(d)	control										sepsis										Treatment
1	0	0	0	0	0	0	0	0	0	0	0	0	0	0	0	0	0	0	0	0	0	0	0	0	0	0	0	0	0	0
2	2.05761	1.98413	1.96078	3.07692	2.47934	1.23457	2.42915	1.6129	1.63265	1.63934	10.7884	7.34694	7.81893	9.67742	7.08661	8.69565	9.88142	12.0968	11.9342	15.1394	12.6016	7.40741	8.3004	8.20312	6.04839	6.29921	7.05882	8.23045	7.31707	6.07287
3	0.411523	1.5873	1.56863	2.69231	1.65289	1.23457	2.02429	2.01613	1.63265	2.45902		8.57143	6.99588	9.27419	9.44882	10.6719	24.1107				21.9512	10.2881	25.6917	10.9375	8.46774	10.2362	8.62745	27.572	4.47154	7.69231
4	0	-0.396825	-1.56863	1.92308	-0.413223	1.64609	-0.404858	-0.806452	0.408163	3.27869		11.4286	11.9342	11.2903	13.7795	13.0435	27.668				4.52675		8.20312	4.43548	5.11811	5.88235		3.25203	4.8583
5	-0.823045	1.98413	0.784314	0.769231	-0.826446	0.823045	0.404858	0.806452	0.816327	1.63934		10.2041	9.0535	8.87097	9.44882	9.88142					3.7037		5.85938	4.03226	3.14961	4.70588		2.84553	1.21457
6	1.23457	3.1746	0	2.30769	-0.413223	-1.23457	1.61943	0.403226	0.816327	-0.409836		6.53061	5.34979	6.45161	6.69291	5.5336					0		3.125	2.01613	1.9685	2.7451		1.21951	1.21457
7	0	3.57143	1.56863	2.69231	-0.826446	-1.23457	1.61943	-2.01613	0.408163	0		4.89796	3.7037	3.62903	4.33071	4.74308					1.23457		2.73438	3.22581	2.75591	2.7451		2.43902	2.42915
