# Supplementary material for: Toll-like receptor 4 damages the intestinal epithelial cells by activating endoplasmic reticulum stress in septic rats
Source: PeerJ journal article supplement (doi:10.7717/peerj.18185), 2024-09-26
Supplement: file_7.xlsx [file file_7.xlsx]

## Sheet:  relative mRNA expression
group		Ct						2-△△Ct
		β-actin	TLR4	XBP1	ATF6	MUC1	MUC2	TLR4	XBP1	ATF6	MUC1	MUC2
Control	1	17.46	28.35	26.79	28.18	25.62	24.58	1	1	1	1	1
	2	17.53	28.3	26.6	28.24	25.65	24.21	1.08673	1.19748	1.00696	1.02811	1.3566
	3	17.61	28.14	26.76	28.32	25.7	24.55	1.28343	1.13288	1.00696	1.04972	1.13288
	4	17.62	28.54	26.87	28.27	25.72	25.18	0.97942	1.05702	1.04972	1.04247	0.737135
	5	17.5	28.14	27	28.15	25.59	24.66	1.18921	0.888843	1.04972	1.04972	0.972655
Sepsis	6	17.52	24.74	24.06	25.66	35.25	28.16	12.7286	6.9163	5.9794	0.00131566	0.0871715
	7	17.62	24.71	24.07	25.64	34.61	27.88	13.9288	7.3615	6.49802	0.00219738	0.11344
	8	17.53	24.75	24.09	25.66	35.33	28.12	12.7286	6.82108	6.02099	0.00125335	0.0902456
	9	17.49	24.64	24.06	25.26	35.04	27.96	13.3614	6.77396	7.72749	0.00149049	0.098073
	10	17.45	24.67	24.1	25.04	33.89	28.09	12.7286	6.40856	8.75435	0.00321715	0.0871715
treatment	11	17.42	25.68	24.55	26.27	27.42	25.32	6.19026	4.59479	3.65533	0.279322	0.582367
	12	17.49	25.56	24.58	26.14	27.75	25.14	7.06162	4.72397	4.19887	0.233258	0.692555
	13	17.34	25.45	24.59	26.85	27.61	25.35	6.86852	4.22807	2.31338	0.231647	0.539614
	14	17.38	25.55	24.54	26.71	27.59	25.37	6.58873	4.50023	2.62079	0.241484	0.547147
	15	17.43	25.52	24.57	26.6	27.63	25.25	6.9644	4.56305	2.92817	0.243164	0.615572
